# Supplementary material for: Inhibition of Aminoglycoside 6’-N-Acetyltransferase Type Ib [Aac(6′)-Ib]: Structure-Activity Relationship of Substituted Pyrrolidine Pentamine Derivatives as Inhibitors
Source: Preprints.org preprint supplement (doi:10.20944/preprints202108.0306.v1), 2021-08-14
Supplement: Supplementary file 1 [file supplementary]

Archive with 2 entries (2 files):
- SUPPLEMENTARY biomedicines v2.pdf
- __MACOSX/._SUPPLEMENTARY biomedicines v2.pdf
