# Supplementary material for: Inhibition of Aminoglycoside 6’-N-Acetyltransferase Type Ib [Aac(6′)-Ib]: Structure-Activity Relationship of Substituted Pyrrolidine Pentamine Derivatives as Inhibitors
Source: Preprints.org preprint supplement (doi:10.20944/preprints202108.0306.v1), 2021-08-14
Supplement: Supplementary file 1 [file supplementary › SUPPLEMENTARY biomedicines v2.pdf]

## *Supplementary Materials*

# **Inhibition of aminoglycoside 6'-N-acetyltransferase type Ib [AAC(6')-Ib]: structure-activity relationship of substituted pyrrolidine pentamine derivatives as inhibitors**

**Kenneth Rocha<sup>1</sup>, Jesus Magallon<sup>1</sup>, Craig Reeves<sup>1</sup>, Kimberly Phan<sup>1</sup>, Peter Vu<sup>1</sup>, Crista L. Oakley-Havens<sup>1</sup>, Stella Kwan<sup>1</sup>, Maria S. Ramirez<sup>1</sup>, Travis LaVoi<sup>2</sup>, Haley Donow<sup>2</sup>, Prem Chapagain<sup>3,4</sup>, Radleigh Santos<sup>5</sup>, Clemencia Pinilla<sup>2</sup>, Marc A. Giulianotti<sup>2</sup>, and Marcelo E. Tolmasky<sup>1\*</sup>**

<sup>1</sup> Center for Applied Biotechnology Studies, Department of Biological Science, College of Natural Sciences and Mathematics, California State University Fullerton, Fullerton, CA

<sup>2</sup> Center for Translational Science, Florida International University, Port St. Lucie, FL

<sup>3</sup> Department of Physics, Florida International University, Miami, FL

<sup>4</sup> Biomolecular Sciences Institute, Florida International University, Miami, FL

<sup>5</sup> Nova Southeastern University, Fort Lauderdale, FL

\* Correspondence: mtolmasky@fullerton.edu; Tel.: 1-657-278-5263

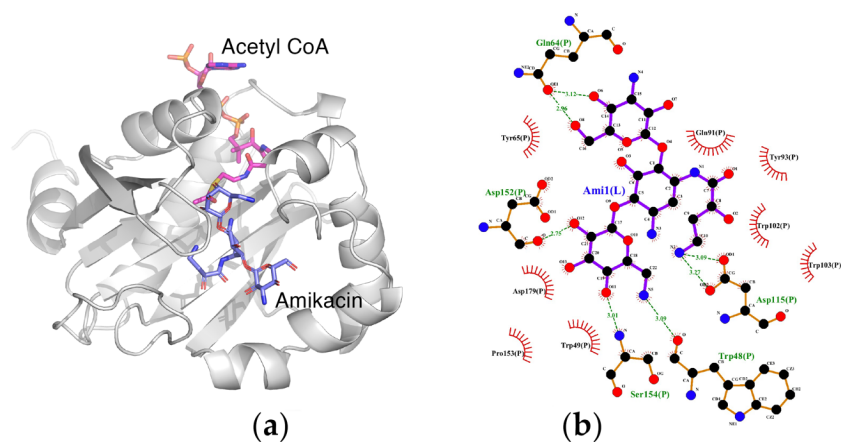

**Figure S1. (a)** The complex of amikacin and AAC(6')-Ib obtained from molecular docking. The bound acetyl CoA is also shown. **(b)** Amikacin has hydrogen bonds with side chain of the charged residues Glu64, Asp115, and Asp52 as well as hydrogen bonds with the backbone of residues Ser154 and Trp48.

|               |       |       |       |       |       |       | Adjusted values (antimicrobial activity of compounds removed) |      |       |       |       |       |       |
|---------------|-------|-------|-------|-------|-------|-------|---------------------------------------------------------------|------|-------|-------|-------|-------|-------|
| 2637.001 (μM) |       |       |       |       |       |       | 2637.001 (μM)                                                 |      |       |       |       |       |       |
| Amk (μg/mL)   |       |       |       |       |       |       | Amk (μg/mL)                                                   |      |       |       |       |       |       |
|               | 0     | 8     | 16    | 24    | 32    | 64    |                                                               | 0    | 8     | 16    | 24    | 32    | 64    |
| 24.0          | 10.8% | 84.8% | 88.2% | 89.7% | 88.5% | 88.3% | 24.0                                                          | 0.0% | 83.0% | 86.8% | 88.4% | 87.1% | 86.9% |
| 16.0          | 4.3%  | 78.7% | 85.1% | 87.9% | 88.9% | 88.9% | 16.0                                                          | 0.0% | 77.7% | 84.5% | 87.3% | 88.4% | 88.4% |
| 8.0           | 8.6%  | 50.2% | 74.5% | 84.2% | 87.4% | 87.0% | 8.0                                                           | 0.0% | 45.6% | 72.1% | 82.8% | 86.2% | 85.8% |
| 4.0           | 6.7%  | 33.2% | 63.2% | 77.2% | 85.0% | 85.9% | 4.0                                                           | 0.0% | 28.4% | 60.6% | 75.5% | 84.0% | 84.9% |
| 0.0           | 0.0%  | 8.9%  | 29.4% | 27.4% | 52.8% | 89.4% | 0.0                                                           | 0.0% | 8.9%  | 29.4% | 27.4% | 52.8% | 89.4% |
| 2637.020 (μM) |       |       |       |       |       |       | 2637.020 (μM)                                                 |      |       |       |       |       |       |
| Amk (μg/mL)   |       |       |       |       |       |       | Amk (μg/mL)                                                   |      |       |       |       |       |       |
|               | 0     | 8     | 16    | 24    | 32    | 64    |                                                               | 0    | 8     | 16    | 24    | 32    | 64    |
| 24.0          | 6.3%  | 86.6% | 87.2% | 77.4% | 89.7% | 91.8% | 24.0                                                          | 0.0% | 85.7% | 86.3% | 75.9% | 88.9% | 91.2% |
| 16.0          | 6.3%  | 82.6% | 88.0% | 88.1% | 87.8% | 90.9% | 16.0                                                          | 0.0% | 81.5% | 87.2% | 87.3% | 86.9% | 90.3% |
| 8.0           | 10.2% | 43.9% | 79.4% | 87.2% | 88.8% | 88.5% | 8.0                                                           | 0.0% | 37.5% | 77.0% | 85.7% | 87.5% | 87.2% |
| 4.0           | 8.2%  | 34.5% | 58.0% | 85.3% | 79.8% | 90.9% | 4.0                                                           | 0.0% | 28.7% | 54.3% | 84.0% | 78.0% | 90.1% |
| 0.0           | 0.0%  | 8.0%  | 23.7% | 41.4% | 75.4% | 91.5% | 0.0                                                           | 0.0% | 8.0%  | 23.7% | 41.4% | 75.4% | 91.5% |
| 2637.004 (μM) |       |       |       |       |       |       | 2637.004 (μM)                                                 |      |       |       |       |       |       |
| Amk (μg/mL)   |       |       |       |       |       |       | Amk (μg/mL)                                                   |      |       |       |       |       |       |
|               | 0     | 8     | 16    | 24    | 32    | 64    |                                                               | 0    | 8     | 16    | 24    | 32    | 64    |
| 24.0          | 5.0%  | 88.4% | 89.6% | 90.5% | 90.7% | 90.7% | 24.0                                                          | 0.0% | 87.8% | 89.1% | 90.0% | 90.2% | 90.2% |
| 16.0          | 3.5%  | 25.5% | 85.4% | 88.4% | 85.3% | 86.9% | 16.0                                                          | 0.0% | 22.9% | 84.9% | 88.0% | 84.8% | 86.4% |
| 8.0           | 5.3%  | 14.7% | 47.1% | 52.7% | 77.1% | 87.8% | 8.0                                                           | 0.0% | 9.9%  | 44.1% | 50.0% | 75.8% | 87.2% |
| 4.0           | 6.0%  | 13.7% | 40.9% | 45.6% | 55.8% | 86.3% | 4.0                                                           | 0.0% | 8.3%  | 37.2% | 42.2% | 53.0% | 85.4% |
| 0.0           | 0.0%  | 6.8%  | 22.0% | 20.4% | 27.7% | 88.2% | 0.0                                                           | 0.0% | 6.8%  | 22.0% | 20.4% | 27.7% | 88.2% |
| 2637.019 (μM) |       |       |       |       |       |       | 2637.019 (μM)                                                 |      |       |       |       |       |       |
| Amk (μg/mL)   |       |       |       |       |       |       | Amk (μg/mL)                                                   |      |       |       |       |       |       |
|               | 0     | 8     | 16    | 24    | 32    | 64    |                                                               | 0    | 8     | 16    | 24    | 32    | 64    |
| 24.0          | 90.8% | 91.2% | 90.8% | 91.0% | 91.1% | 91.3% | 24.0                                                          | 0.0% | 4.9%  | 0.7%  | 2.4%  | 3.9%  | 5.5%  |
| 16.0          | 19.1% | 91.3% | 90.5% | 89.8% | 90.6% | 91.0% | 16.0                                                          | 0.0% | 89.2% | 88.3% | 87.4% | 88.4% | 88.9% |
| 8.0           | 5.9%  | 26.1% | 87.8% | 81.7% | 89.1% | 90.3% | 8.0                                                           | 0.0% | 21.5% | 87.0% | 80.6% | 88.4% | 89.7% |
| 4.0           | 8.0%  | 16.1% | 30.2% | 36.0% | 26.1% | 90.5% | 4.0                                                           | 0.0% | 8.8%  | 24.1% | 30.5% | 19.7% | 89.7% |
| 0.0           | 0.0%  | 7.2%  | 16.2% | 26.6% | 23.8% | 90.7% | 0.0                                                           | 0.0% | 7.2%  | 16.2% | 26.6% | 23.8% | 90.7% |
| 2637.007 (μM) |       |       |       |       |       |       | 2637.007 (μM)                                                 |      |       |       |       |       |       |
| Amk (μg/mL)   |       |       |       |       |       |       | Amk (μg/mL)                                                   |      |       |       |       |       |       |
|               | 0     | 8     | 16    | 24    | 32    | 64    |                                                               | 0    | 8     | 16    | 24    | 32    | 64    |
| 24.0          | 1.6%  | 63.7% | 67.8% | 79.0% | 77.6% | 82.2% | 24.0                                                          | 0.0% | 63.2% | 67.3% | 78.6% | 77.3% | 81.9% |
| 16.0          | 1.3%  | 61.0% | 72.6% | 78.3% | 78.8% | 81.1% | 16.0                                                          | 0.0% | 60.5% | 72.3% | 78.0% | 78.5% | 80.8% |
| 8.0           | 2.2%  | 51.4% | 70.5% | 79.3% | 75.7% | 82.3% | 8.0                                                           | 0.0% | 50.3% | 69.8% | 78.8% | 75.2% | 81.9% |
| 4.0           | 3.6%  | 39.4% | 61.9% | 78.1% | 52.5% | 88.7% | 4.0                                                           | 0.0% | 37.1% | 60.5% | 77.3% | 50.7% | 88.3% |
| 0.0           | 0.0%  | 6.9%  | 16.0% | 26.4% | 42.6% | 89.1% | 0.0                                                           | 0.0% | 6.9%  | 16.0% | 26.4% | 42.6% | 89.1% |
| 2637.010 (μM) |       |       |       |       |       |       | 2637.010 (μM)                                                 |      |       |       |       |       |       |
| Amk (μg/mL)   |       |       |       |       |       |       | Amk (μg/mL)                                                   |      |       |       |       |       |       |
|               | 0     | 8     | 16    | 24    | 32    | 64    |                                                               | 0    | 8     | 16    | 24    | 32    | 64    |
| 24.0          | 4.6%  | 71.8% | 78.8% | 81.4% | 81.1% | 87.2% | 24.0                                                          | 0.0% | 70.4% | 77.8% | 80.5% | 80.2% | 86.6% |
| 16.0          | 4.5%  | 68.8% | 80.0% | 78.7% | 81.6% | 86.2% | 16.0                                                          | 0.0% | 67.3% | 79.1% | 77.7% | 80.7% | 85.5% |
| 8.0           | 4.8%  | 60.5% | 71.8% | 79.8% | 84.4% | 87.9% | 8.0                                                           | 0.0% | 58.5% | 70.4% | 78.8% | 83.7% | 87.3% |
| 4.0           | 4.3%  | 50.7% | 69.6% | 78.7% | 83.6% | 87.6% | 4.0                                                           | 0.0% | 48.5% | 68.2% | 77.8% | 82.9% | 87.1% |
| 0.0           | 0.0%  | 4.6%  | 25.5% | 20.3% | 65.5% | 89.1% | 0.0                                                           | 0.0% | 4.6%  | 25.5% | 20.3% | 65.5% | 89.1% |
| 2637.012 (μM) |       |       |       |       |       |       | 2637.012 (μM)                                                 |      |       |       |       |       |       |
| Amk (μg/mL)   |       |       |       |       |       |       | Amk (μg/mL)                                                   |      |       |       |       |       |       |
|               | 0     | 8     | 16    | 24    | 32    | 64    |                                                               | 0    | 8     | 16    | 24    | 32    | 64    |
| 24.0          | -0.7% | 89.5% | 89.4% | 87.6% | 85.1% | 91.5% | 24.0                                                          | 0.0% | 89.6% | 89.5% | 87.7% | 85.2% | 91.6% |
| 16.0          | 0.5%  | 33.5% | 79.2% | 83.3% | 85.9% | 87.9% | 16.0                                                          | 0.0% | 33.2% | 79.0% | 83.2% | 85.8% | 87.9% |
| 8.0           | 2.7%  | 15.6% | 44.0% | 54.0% | 70.2% | 88.3% | 8.0                                                           | 0.0% | 13.3% | 42.4% | 52.7% | 69.4% | 88.0% |
| 4.0           | 4.8%  | 12.2% | 33.4% | 57.9% | 54.4% | 85.7% | 4.0                                                           | 0.0% | 7.8%  | 30.0% | 55.7% | 52.1% | 85.0% |
| 0.0           | 0.0%  | 8.9%  | 16.8% | 21.8% | 52.1% | 86.0% | 0.0                                                           | 0.0% | 8.9%  | 16.8% | 21.8% | 52.1% | 86.0% |
| 2637.011 (μM) |       |       |       |       |       |       | 2637.011 (μM)                                                 |      |       |       |       |       |       |
| Amk (μg/mL)   |       |       |       |       |       |       | Amk (μg/mL)                                                   |      |       |       |       |       |       |
|               | 0     | 8     | 16    | 24    | 32    | 64    |                                                               | 0    | 8     | 16    | 24    | 32    | 64    |
| 24.0          | 2.5%  | 86.1% | 83.6% | 80.8% | 83.1% | 82.0% | 24.0                                                          | 0.0% | 85.7% | 83.2% | 80.3% | 82.6% | 81.5% |
| 16.0          | 1.8%  | 77.6% | 85.4% | 86.2% | 86.7% | 88.6% | 16.0                                                          | 0.0% | 77.2% | 85.2% | 85.9% | 86.4% | 88.4% |
| 8.0           | 4.7%  | 36.7% | 70.4% | 80.6% | 84.8% | 87.0% | 8.0                                                           | 0.0% | 33.5% | 68.9% | 79.6% | 84.0% | 86.4% |
| 4.0           | 4.8%  | 27.5% | 46.5% | 69.3% | 82.1% | 86.2% | 4.0                                                           | 0.0% | 23.9% | 43.8% | 67.8% | 81.2% | 85.5% |
| 0.0           | 0.0%  | 3.7%  | 31.3% | 54.5% | 76.2% | 87.1% | 0.0                                                           | 0.0% | 3.7%  | 31.3% | 54.5% | 76.2% | 87.1% |
| 2637.013 (μM) |       |       |       |       |       |       | 2637.013 (μM)                                                 |      |       |       |       |       |       |
| Amk (μg/mL)   |       |       |       |       |       |       | Amk (μg/mL)                                                   |      |       |       |       |       |       |
|               | 0     | 8     | 16    | 24    | 32    | 64    |                                                               | 0    | 8     | 16    | 24    | 32    | 64    |
| 24.0          | 2.4%  | 81.2% | 83.7% | 88.3% | 83.3% | 90.0% | 24.0                                                          | 0.0% | 80.7% | 83.3% | 88.0% | 82.9% | 89.7% |
| 16.0          | 3.9%  | 74.3% | 84.1% | 87.5% | 86.2% | 86.0% | 16.0                                                          | 0.0% | 73.2% | 83.5% | 87.0% | 85.7% | 85.4% |
| 8.0           | 5.0%  | 48.2% | 76.1% | 85.2% | 78.4% | 88.4% | 8.0                                                           | 0.0% | 45.5% | 74.8% | 84.4% | 77.3% | 87.8% |
| 4.0           | 4.9%  | 25.2% | 55.9% | 77.5% | 58.4% | 87.5% | 4.0                                                           | 0.0% | 21.3% | 53.6% | 76.3% | 56.3% | 86.9% |
| 0.0           | 0.0%  | 5.6%  | 33.1% | 31.2% | 57.2% | 89.0% | 0.0                                                           | 0.0% | 5.6%  | 33.1% | 31.2% | 57.2% | 89.0% |
| 2637.014 (μM) |       |       |       |       |       |       | 2637.014 (μM)                                                 |      |       |       |       |       |       |
| Amk (μg/mL)   |       |       |       |       |       |       | Amk (μg/mL)                                                   |      |       |       |       |       |       |
|               | 0     | 8     | 16    | 24    | 32    | 64    |                                                               | 0    | 8     | 16    | 24    | 32    | 64    |
| 24.0          | 3.9%  | 61.1% | 73.1% | 75.2% | 77.7% | 78.0% | 24.0                                                          | 0.0% | 59.5% | 72.0% | 74.2% | 76.7% | 77.1% |
| 16.0          | 3.3%  | 57.0% | 65.2% | 64.1% | 57.8% | 87.5% | 16.0                                                          | 0.0% | 55.5% | 64.0% | 62.9% | 56.3% | 87.1% |
| 8.0           | 2.9%  | 41.4% | 43.6% | 52.8% | 54.3% | 84.3% | 8.0                                                           | 0.0% | 39.7% | 42.0% | 51.4% | 52.9% | 83.8% |
| 4.0           | 3.6%  | 22.2% | 32.8% | 59.7% | 42.1% | 89.4% | 4.0                                                           | 0.0% | 19.3% | 30.3% | 58.2% | 39.9% | 89.0% |
| 0.0           | 0.0%  | 6.4%  | 8.7%  | 16.3% | 27.1% | 90.5% | 0.0                                                           | 0.0% | 6.4%  | 8.7%  | 16.3% | 27.1% | 90.5% |

**Figure S2.** Checkerboard assays. The left column shows the measured values (medians %). The right column shows the adjusted values after removing any antimicrobial activity exerted by the testing compounds. Adjustment was carried out as described in Materials and Methods.
